# Supplementary material for: An Aptamer-Based Proteomic Analysis of Plasma from Cats (Felis catus) with Clinical Feline Infectious Peritonitis
Source: MDPI journal article supplement (doi:10.3390/v16010141), 2024-01-18
Supplement: s1 [file s1]

Supplemental Figures:

Figure S1: MAPK signaling

Figure S2: JAK STAT signaling pathway

Figure S3: Natural Killer Cell Mediated Cytotoxicity

Supplemental Tables - a single excel file, tab titles are listed below

Table S1: SOMAscan protein IDs

Table S2: SOMAscan results

Table S3: SOMAscan with prot. & cat IDs

Table S4: t-tests

Table S5: Enrichment Results

Table S6: Enrichment Path. Input List

Table S7: Gene ID duplication cleanup

Table S8: Patient Information
